# Supplementary material for: Analysis of Copy Number Variations in Solid Tumors Using a Next Generation Sequencing Custom Panel
Source: MDPI journal article supplement (doi:10.3390/jmp2020013), 2021-05-21
Supplement: s1 [file s1]

Archive with 1 entries (1 files):
- jmp-1182894-supplementary.pdf
