# Supplementary material for: Analysis of Copy Number Variations in Solid Tumors Using a Next Generation Sequencing Custom Panel
Source: MDPI journal article supplement (doi:10.3390/jmp2020013), 2021-05-21
Supplement: s1 [file s1 › jmp-1182894-supplementary.pdf]

## **Supplementary Information**

**Copy number gains of clinically relevant genes in advanced solid tumors.**

**Marta Vives *et al.***

## **INDEX**

**SUPPLEMENTARY TABLES.....1**

**SUPPLEMENTARY FIGURES.....5**

**Table S1:** Characteristics of patients included in the prospective cohort

| <b>Histology</b>            | <b>Total of patients</b> | <b>N=243 (%)</b> |
|-----------------------------|--------------------------|------------------|
| <b>Lung (NSCLC)</b>         | <b>74 (30.4%)</b>        |                  |
| Baseline                    |                          | 54               |
| Progression                 |                          | 20               |
| <b>Colorectal carcinoma</b> | <b>148 (61%)</b>         |                  |
| Baseline                    |                          | 142              |
| Progression                 |                          | 6                |
| <b>Other tumors</b>         | <b>21 (8.6%)</b>         |                  |
| Baseline                    |                          | 18               |
| Progression                 |                          | 3                |

Other tumors include Melanoma (6 cases, three after progression to therapy), Ovary (4), GIST (5), Thyroid (2), Esophagus (2), Renal (1), and Bile Duct (1).

**Table S2:** Description of gene and exons included in the GeneRead™ QIAact Custom Solid Tumor Panel

| <b>GENE</b>   | <b>Exons</b>           |
|---------------|------------------------|
| <i>ALK</i>    | 22, 23, 24, 25         |
| <i>BRAF</i>   | 11, 15                 |
| <i>CDK4</i>   | CNV only               |
| <i>CDK6</i>   | CNV only               |
| <i>EGFR</i>   | 12, 18, 19, 20, 21     |
| <i>ERBB2</i>  | 8, 17, 19, 20, 21      |
| <i>ERBB4</i>  | 8, 17, 19, 20, 21      |
| <i>FGFR1</i>  | CNV only               |
| <i>IDH1</i>   | 4                      |
| <i>IDH2</i>   | 4                      |
| <i>KIT</i>    | 8, 9, 11, 13, 14, 17   |
| <i>KRAS</i>   | 2, 3, 4                |
| <i>MET</i>    | 13, 15 (METΔ14)        |
| <i>NRAS</i>   | 2, 3, 4                |
| <i>PDGFRA</i> | 12, 18                 |
| <i>PIK3CA</i> | 10, 21                 |
| <i>RICTOR</i> | CNV only               |
| <i>ROS1</i>   | 38                     |
| <i>STK11</i>  | 2, 3, 4, 5, 6, 7, 8, 9 |
| <i>TP53</i>   | 4, 5, 6, 7, 8, 9       |

**Table S3:** Results of CNVs alterations observed in the twenty cell lines included in the validation cohort. FISH analysis of *EGFR*, *ERBB2* or *MET* were performed.

| Cell lines          | CNVs detected by GeneRead™<br>QIAact Custom Solid Tumor Panel<br>(in house algorithm) |               | FISH confirmation          |
|---------------------|---------------------------------------------------------------------------------------|---------------|----------------------------|
|                     |                                                                                       |               |                            |
| <b>PC9</b>          | <i>EGFR</i>                                                                           | <i>CKIT</i>   | <i>EGFR</i> amplification  |
| <b>PC9-ER</b>       | <i>EGFR</i>                                                                           | <i>CDK6</i>   | <i>EGFR</i> amplification  |
| <b>PC9-GR1</b>      | <i>EGFR</i>                                                                           | <i>CDK6</i>   | <i>EGFR</i> amplification  |
| <b>PC9-GR2</b>      | <i>CDK6</i>                                                                           | <i>RICTOR</i> | <i>EGFR</i> not amplified  |
| <b>PC9-GR3</b>      | <i>EGFR</i>                                                                           | <i>CDK6</i>   | <i>EGFR</i> amplification  |
| <b>PC9-GR4</b>      | <i>EGFR</i>                                                                           | <i>CKIT</i>   | <i>EGFR</i> amplification  |
| <b>PC9-GR5</b>      | <i>EGFR</i>                                                                           | <i>CKIT</i>   | <i>EGFR</i> amplification  |
| <b>PC9-GR1-AZD1</b> | <i>CDK6</i>                                                                           | <i>RICTOR</i> | <i>EGFR</i> not amplified  |
| <b>PC9-GR1-AZD2</b> | <i>CDK6</i>                                                                           | <i>RICTOR</i> | <i>EGFR</i> not amplified  |
| <b>PC9-GR1-AZD3</b> | <i>CDK6</i>                                                                           |               | <i>EGFR</i> not amplified  |
| <b>PC9-GR1-AZD4</b> | <i>CDK6</i>                                                                           |               | <i>EGFR</i> not amplified  |
| <b>PC9-GR4-AZD1</b> | <i>CDK6</i>                                                                           |               | <i>EGFR</i> not amplified  |
| <b>PC9-GR4-AZD2</b> | <i>CDK6</i>                                                                           |               | <i>EGFR</i> not amplified  |
| <b>11-18</b>        | <i>NRAS</i>                                                                           | <i>CKIT</i>   | <i>EGFR</i> not amplified  |
| <b>11-18 GR1</b>    | <i>NRAS</i>                                                                           | <i>CKIT</i>   | <i>EGFR</i> not amplified  |
| <b>11-18 GR4</b>    | <i>NRAS</i>                                                                           | <i>CKIT</i>   | <i>EGFR</i> not amplified  |
| <b>EBC1</b>         | <i>MET</i>                                                                            |               | <i>MET</i> amplification   |
| <b>Hs746T</b>       | <i>MET</i>                                                                            |               | <i>MET</i> amplification   |
| <b>CRL-2351</b>     | <i>ERBB2</i>                                                                          |               | <i>ERBB2</i> amplification |
| <b>HCC827</b>       | <i>EGFR</i>                                                                           | <i>CDK4</i>   | <i>EGFR</i> amplification  |

**Table S4:** Characteristics of commercial GeneRead™ QIAact Lung DNA Panel (Qiagen). The panel includes analysis of CNVs in 5 genes: *EGFR*, *ERBB2*, *MET*, *FGFR1* and *RICTOR*.

|                                           |            |
|-------------------------------------------|------------|
| <b>Total number of variants</b>           | <b>549</b> |
| <b>Number of unique variant positions</b> | <b>335</b> |
| <b>SNVs</b>                               | <b>320</b> |
| <b>MNVs</b>                               | <b>52</b>  |
| <b>Insertions</b>                         | <b>106</b> |
| <b>Deletions</b>                          | <b>31</b>  |
| <b>Replacements</b>                       | <b>40</b>  |
| <b>CNV genes</b>                          | <b>5</b>   |

## SUPPLEMENTAL FIGURE LEGENDS

**Figure S1.** Heatmap of the FFPE NSCLC patients included in the retrospective cohort (n=50). All samples were analyzed by the GeneRead™ QIAact Custom Solid Tumor Panel using an “in-house” CNV algorithm and an alternative technique, either commercial NGS GeneRead™ QIAact Lung DNA Panel or FISH for *EGFR*, *ERBB2*, *MET* and *FGFR1* genes. In green, patients with CNVs in other genes not analyzed by FISH or commercial panel.

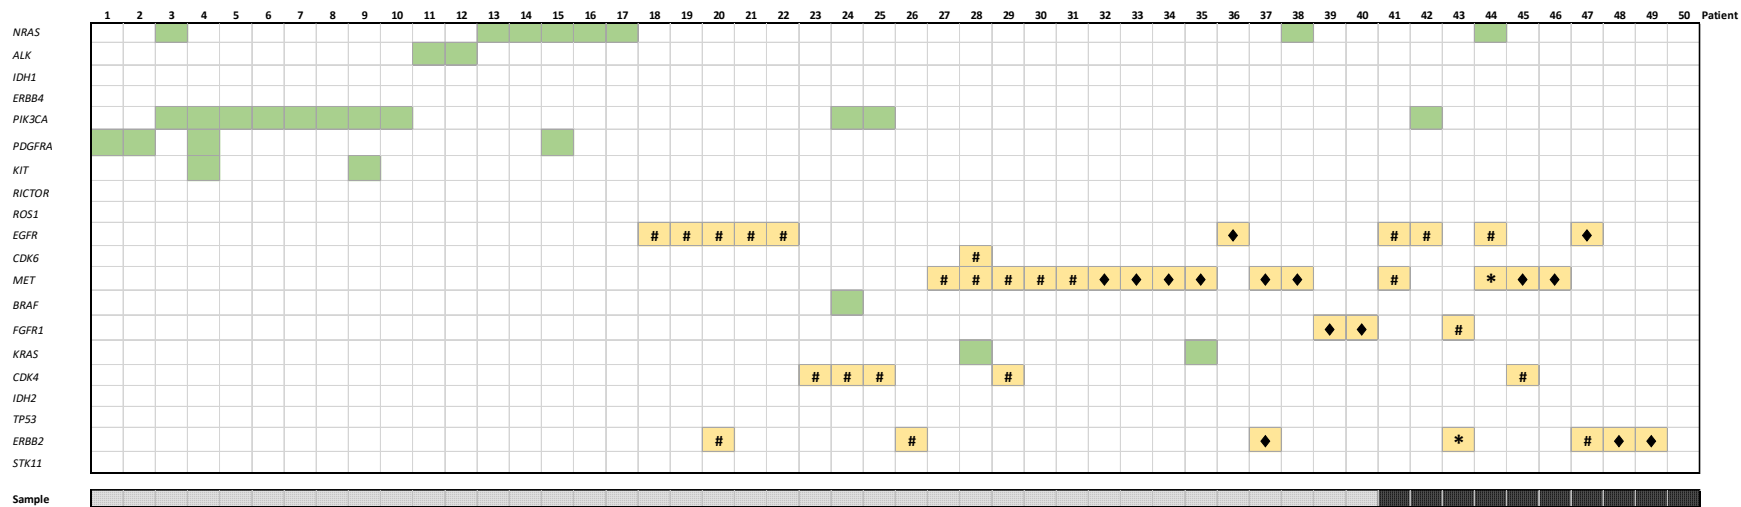

- ◆ CNV detected by NGS custom (in-house algorithm) and commercial NGS panel. Confirmed by FISH
- # CNV detected by NGS custom (in-house algorithm) and commercial NGS panel. FISH not done
- \* CNV detected by NGS custom (in-house algorithm) and commercial NGS panel. Discordance with FISH results
- Green CNV detected by NGS custom panel (in-house algorithm). FISH not done. CNV analysis not included in the commercial NGS panel

Baseline  
Progression
